# Supplementary material
Source: PubMed Central journal article supplement (PMC7508619)
Supplement: AAC.00056-20-s0001.pdf [file AAC.00056-20-s0001.pdf]

1 SUPPLEMENTAL MATERIAL

2

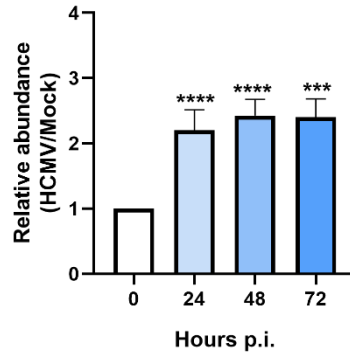

3

4 **FIG S1 Quantification of hCYP51 induction in HFF cells infected with HCMV.**

5 Upregulation of host hCYP51 protein was analyzed in HFF cells infected with HCMV AD169  
6 by Western blot and densitometry analysis was performed with ImageJ software. hCYP51  
7 signal was normalized by its respective  $\beta$ -actin signal and plotted with respect to uninfected  
8 sample (Mock). Graph represents the mean  $\pm$  SD of n = 4 independent experiments. Data were  
9 analysed by a one-way ANOVA followed by Dunnett's multiple comparison tests. \*\*\*p =  
10 0.0001; \*\*\*\*p<0.0001, compared to control (mock sample).

11  
12  
13  
14  
15  
16  
17  
18  
19  
20  
21  
22  
23  
24  
25  
26  
27  
28  
29  
30  
31  
32  
33  
34

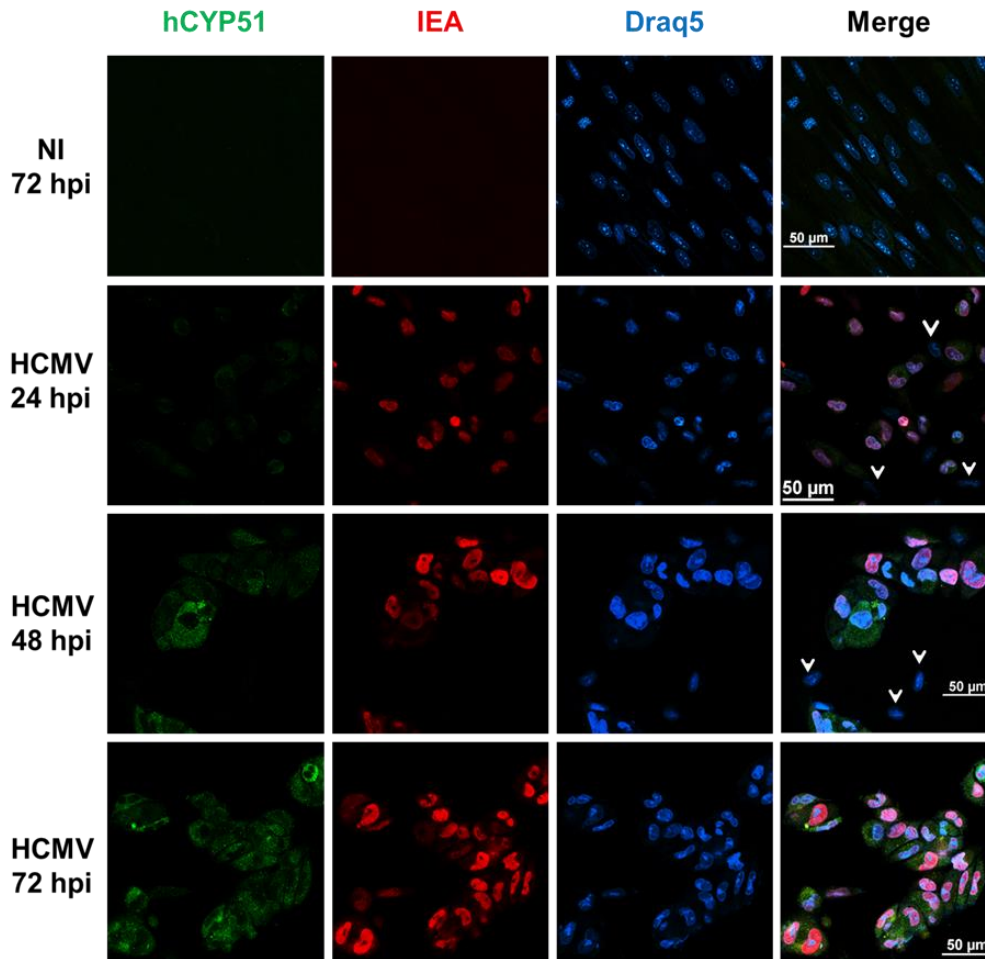

35

36 **FIG S2 Analysis of hCYP51 and viral proteins expression during HCMV infection in**  
 37 **living cells.** Host hCYP51 protein and viral IE antigens (IEA) were detected in living cells by  
 38 immunofluorescence analysis both in uninfected HFFs (NI) and in HFFs infected with HCMV  
 39 at an MOI = 0.25 PFU/cell at the indicated h p.i. Draq5 was used to stain the cell nuclei. White  
 40 arrows in the merge panels at 24 and 48 h p.i. indicate the nuclei of uninfected HFF cells in  
 41 the same field with HCMV-infected cells. Progression of HCMV cycle is confirmed by  
 42 appearance of kidney-shaped nuclei of infected cells containing viral replication compartments  
 43 from 48 h p.i.

44

45

46

47

48

49

50

51

52

53

54

55 **Table S1. List of the oligonucleotides used in this study**

56

|                                   |                    |                              |
|-----------------------------------|--------------------|------------------------------|
| <u><i>hCYP51</i></u> primer set   | Primer FOR         | CAGGTTGGCTGCCTTTGC           |
|                                   | Primer REV         | CTTGATTTCCCGATGAGCTCTGT      |
| <u><i>UL54</i></u> primer set     | Primer FOR         | GCACTGTACGGCAGAAAAGCCGGCTC   |
|                                   | Primer REV         | ACAGCATTCGTGCGC              |
| <u><i>GAPDH</i></u> primer set    | Primer FOR         | AGCCACATCGCTCAGACAC          |
| <u><i>ULI22</i></u> primer set    | Primer FOR (CM-5T) | TCATCCACACTAGGAGAGCAGACT     |
|                                   | Primer REV (CM-3T) | GCCAAGCGGCCTCTGAT            |
|                                   | Probe              | ACTGGGCAAAGACCTTCATGCAGATCTC |
| <u><i>β-globin</i></u> primer set | Primer FOR         | AGGGCCTCACCACCAACTT          |
|                                   | Primer REV         | GCACCTGACTCCTGAGGAGAA        |

57

58

59

60

61 **Table S2. List of the antibodies used in this study**

62

| Antigen                           | Supplier       | Clone ID   | Usage                    |
|-----------------------------------|----------------|------------|--------------------------|
| IE1/IE2                           | Argene-Biosoft | E13        | WB (1:400); IF(1:500)    |
| hCYP51                            | Sigma          | polyclonal | WB (1:2,000); IF (1:500) |
| Actin                             | Sigma          | AC-74      | WB (1:8,000)             |
| HRP-Rabbit IgG (H+L)              | Santa Cruz     | -          | WB (1:2,000)             |
| HRP-Mouse IgG (H+L)               | Santa Cruz     | -          | WB (1:2,000)             |
| Alexa Fluor™ 488 Rabbit IgG (H+L) | Invitrogen     | -          | IF (1:2,000)             |
| Alexa Fluor™ 546 Mouse IgG (H+L)  | Invitrogen     | -          | IF (1:2,000)             |

63 WB: Western Blot; IF: immunofluorescence.

64

65

66

67

68

69 **Table S3. Simulated Dose Reduction Index for GCV and PCZ against HCMV**  
 70

| Viral inhibition effect<br>(%) | GCV <sup>a</sup> (μM) |              | PCZ <sup>a</sup> (μM) |             | DRI <sup>b</sup> | DRI <sup>b</sup> |
|--------------------------------|-----------------------|--------------|-----------------------|-------------|------------------|------------------|
|                                |                       |              |                       |             | GCV              | PCZ              |
| 50                             | 2.91 ± 0.76           | 3.13 ± 0.42  | 3.86 ± 0.72           | 2.79 ± 0.16 |                  |                  |
| 75                             | 6.77 ± 1.08           | 6.36 ± 0.10  | 6.22 ± 0.74           | 3.93 ± 0.22 |                  |                  |
| 90                             | 15.82 ± 0.91          | 13.08 ± 2.14 | 10.05 ± 0.51          | 5.57 ± 0.95 |                  |                  |
| 95                             | 28.27 ± 0.35          | 21.48 ± 5.63 | 13.96 ± 0.06          | 7.09 ± 1.75 |                  |                  |

71 <sup>a</sup> Drug concentration required for the inhibition of viral replication at the indicated extent as determined by PRAs  
 72 in infected HFF cells. Data represent the mean ± SD of n = 3 independent experiments in triplicate.

73 <sup>b</sup> Dose reduction index, i.e., the simulated fold of reduction of each drug in combination compared to the dose  
 74 required for the drug alone to obtain the same inhibitory effect.

75
